# Supplementary material for: WIN 55,212-2 shows anti-inflammatory and survival properties in human iPSC-derived cardiomyocytes infected with SARS-CoV-2
Source: PeerJ. 2021 Oct 8;9:e12262. doi: 10.7717/peerj.12262 (PMC8504461; doi:10.7717/peerj.12262)
Supplement: Supplemental Information 5 [file peerj-09-12262-s005.xlsx]

## Sheet: Planilha1
	Figure 1 A	CTRL	WIN 1 µM
		1	1.33873
		1	0.715123
		1	1.44103
	Figura 1B	CTRL	WIN 1 µM
		0.464922	0.438578
		0.42734	0.690062
		0.467199	0.661071
		0.478183	0.920188
	Figura 2B	MOCK	MOI 0.1	MOI 0.1 + WIN 1 µM
		0	37.4827	44.9618
		0	37.0249	44.5747
		0	3.08847	0.718757
	Figura 2C	MOCK	WIN 1 µM
		4950000	2000000
		2200000	140000
		1200000	467000
		370000	190000
	Figure 3A	Control	Control	Control	WIN 1 µM	WIN 1 µM	WIN 1 µM	CoV	CoV	CoV	CoV WIN	CoV WIN	CoV WIN
	24h	12.02	9.3	10.2	8.31	14.22	11.42	24.12	33.33	28.81	18.4	16	21.82
	48h	10.34	14.6	12.6	11	18.4	12.32	49.31	44.26	58.21	27.31	25.43	32.16
	72h	32.21	27.31		21.38	24.93		37.31	33.26		22.76	29.37
	Figure 3B	Control	Control	Control	WIN 1 µM	WIN 1 µM	WIN 1 µM	CoV	CoV	CoV	CoV WIN	CoV WIN	CoV WIN
	24h	15.2	8.5	17.21	11	14.1	12.3	32.24	19.3	28.02	27.21	18.32	17.8
	48h	12.53	15.01	13.4	17.1	18.3	9.87	88.21	77.33	61.02	27.21	18.32	17.8
	72h	37.17	44.7		24.06	40.21		84.21	70.04		45.8	31.86
	Figure 3C	Control	Control	Control	WIN 1 µM	WIN 1 µM	WIN 1 µM	CoV	CoV	CoV	CoV WIN	CoV WIN	CoV WIN
	24h	19.44	23.2	37.21	36.4	22.92	23.12	68.23	95.88	102.43	48.32	44.12	69.18
	48h	48.78	39.21	51.72	49.33	13.98	55.82	117.02	94.21	137.87	73.22	58.61	64.91
	72h	47.71	42.06	38.42	47.24	30.28	32.23	158.43	125.11	182.81	72.87	64.6	57.04
	Figure 3D	Control	Control	Control	WIN 1 µM	WIN 1 µM	WIN 1 µM	CoV	CoV	CoV	CoV WIN	CoV WIN	CoV WIN
	24h	100	100	100	103.448	120.69	118.966	198.276	294.828	190.517	191.379	207.759	126.724
	48h	100	100	100	122.034	154.237	87.2881	527.966	499.152	662.712	188.136	204.237	124.576
	72h	100	100		54.6196	51.6304		268.207	280.707		168.75	112.228
	Figure S3A	VEH	10 nM	50 nM	100 nM	300 nM	700 nM	1 µM	5 µM	10 µM
		78.5839	85.2374	80.5467	100.075	99.343	85.4703	90.2609	53.1008	7.85673
		83.6073	82.4097	73.4274	120.335	121.765	87.8989	102.104	49.0754	8.52208
		77.1534	95.251	107.826	97.7461	104.333	86.3685	93.4878	65.1437	9.45358
		92.0573	108.725	104.466	117.54	125.824	108.591	126.489	60.0538	10.0524
		103.535	99.4095	121.965	151.274	129.417	119.337	107.859	32.1422	11.6493
		84.7052	104	99.6424	125.791	126.523	123.296	121.765	43.5863	8.62188
		104.133
		130.349
		121.366
		117.241
		107.061
		100.208
	Figure S3B	MYH6	MYH7
		0.874964	0.900644
		1.3469	1.0944
		2.386	1.22065
